# Supplementary material for: Prevalence of Diamine Oxidase Enzyme (DAO) Deficiency in Subjects with Insomnia-Related Symptoms
Source: Preprints.org preprint supplement (doi:10.20944/preprints202407.1341.v1), 2024-07-16
Supplement: Supplementary file 1 [file supplementary]

**Supplementary Materials**

**Table S1.** Combinations of SNPs variants in the study population

| Variables | Total patients, n = 167 |
| --- | --- |
| Combinations (**OR**), n (%) |  |
| (c.691G>T) or (c.995C>T) or (c.1990C>G) | 133 (79.6) |
| (c.47C>T) or (c.995C>T) or (c.1990C>G) | 132 (79.0) |
| (c.691G>T) or (c.47C>T) or (c.1990C>G) | 132 (79.0) |
| (c.691G>T) or (c.47C>T) or (c.995C>T) | 131 (78.4) |
| (c.691G>T) or (c.1990C>G) | 124 (74.3) |
| (c.691G>T) or (c.995C>T) | 124 (74.3) |
| (c.47C>T) or (c.995C>T) | 123 (73.7) |
| (c.691G>T) or (c.47C>T) | 122 (73.1) |
| (c.47C>T) or (c.1990C>G) | 121 (72.5) |
| (c.995C>T) or (c.1990C>G) | 108 (64.7) |
| Combinations (**AND**), n % |  |
| (c.691G>T) & (c.47C>T) | 93 (55.7) |
| (c.691G>T) & (c.995C>T) | 71 (42.5) |
| (c.47C>T) & (c.995C>T) | 69 (41.3) |
| (c.691G>T) & (c.47C>T) & (c.995C>T) | 63 (37.7) |
| (c.47C>T) & (c.1990C>G) | 56 (33.5) |
| (c.691G>T) & (c.1990C>G) | 56 (33.5) |
| (c.691G>T) & (c.47C>T) & (c.1990C>G) | 51 (30.5) |
| (c.995C>T) & (c.1990C>G) | 49 (29.3) |
| (c.47C>T) & (c.995C>T) & (c.1990C>G) | 43 (25.7) |
| (c.691G>T) & (c.995C>T) & (c.1990C>G) | 43 (25.7) |
| (c.691G>T) & (c.47C>T) & (c.995C>T) & (c.1990C>G) | 40 (24.0) |
